# Supplementary material for: One-dimensional N-doped carbon nanofibers produced by pre-oxide treatment for effective lithium storage
Source: Royal Society of Chemistry journal article supplement (doi:10.1039/d2dt01307j), 2022-01-01
Supplement: d2dt01307j1.pdf [file d2dt01307j1.pdf]

## Supplementary Information

One-dimensional N-doped carbon nanofibers produced by pre-oxidized  
treatment for effective lithium storage

Wei Song <sup>a, b, \*</sup>, Ruina Shi <sup>a, b, \*</sup>, Lixin Zhang <sup>a, b</sup>, Tiantian Gao <sup>a, b</sup>, Wenhao Lian <sup>a</sup>,  
Kankan Liu <sup>b, c</sup>, Xueting Niu <sup>a</sup>, Yuqi Wu <sup>a</sup>, Kangrui Nie <sup>a</sup>

<sup>a</sup> School of Chemical Engineering and Technology, North University of China,  
Taiyuan 030051, China

<sup>b</sup> Shanxi Key Laboratory of High Performance Battery Materials and Devices,  
Taiyuan 030051, China

<sup>c</sup> School of Environment and Safety Engineering, North University of China, Taiyuan  
030051, China

\* Corresponding author. E-mail address: 20200136@nuc.edu.cn (W. Song);  
serena@nuc.edu.cn (R. Shi)

## Experimental Section

### Preparation Procedure

0.5 g polyvinylpyrrolidone (PVP) was dissolved into 10 mL absolute ethanol and stirred for 12 h. Then the pre-spinning solution was transferred to a syringe with a 20# stainless steel needle. The advancing speed of  $0.1 \text{ mm min}^{-1}$ , positive and negative pressures of 15 kV and -2 kV, and a needle-to-receiver distance of 11 cm were utilized for electrospinning. After that the spinning film was peeled off, dried at  $60 \text{ }^\circ\text{C}$  overnight, and calcinated at 250, 300,  $350 \text{ }^\circ\text{C}$  in an air atmosphere for 2 h with a heating rate of  $1 \text{ }^\circ\text{C min}^{-1}$  and cooling rate of  $2 \text{ }^\circ\text{C min}^{-1}$ . The as-obtained samples were labeled as NCNF-250, NCNF-300, and NCNF-350. The NCNF-300 was carbonized at  $500 \text{ }^\circ\text{C}$  for 2 h under an  $\text{N}_2$  atmosphere, and the as-obtained sample was named as NCNF-300-500.

### Characterization Techniques

X-ray diffraction (XRD, Rigaku D/max 2500, Cu  $\text{K}\alpha$  radiation), and scanning electron microscopy (SEM, MAIA3 TESCAN) were performed to examine the structures and morphologies of the samples.  $\text{N}_2$  adsorption-desorption measurements were used to evaluate the porosity of the samples with a 3H-2000PS2 analyzer (BeiShiDe Instruments S&T. Co., Beijing). The composition and functional groups of the samples were examined using Fourier-transform infrared spectroscopy (FT-IR, Nicolet IS50, USA) and X-ray photoelectron spectroscopy (XPS, Thermo Escalab 250Xi).

### Electrochemical Measurements

The CR2025-type half cells were assembled in an Ar-filled glovebox utilizing the as-synthesized anode materials, PVDF binder, and conductive agent (Super P) coated on Cu foil in a mass ratio of 7:2:1 as the anode, PP membrane (Celgard 2400) as the separator, Li foil as the counter and reference electrodes, and 1.0 M  $\text{LiPF}_6$  [ $V_{\text{EC}}: V_{\text{DMC}} = 1:1$ , 5 wt% FEC] as the electrolyte. The loading mass of active material was  $2.0 \text{ mg}\cdot\text{cm}^{-2}$  for all of as-prepared samples. The voltage window for the electrochemical performance test was set between 0.01 and 3.0 V. The galvanostatic charge/discharge

tests were measured on a LAND battery tester (CT3001A). Cyclic voltammetry (CV) curves and electrochemical impedance spectroscopy (EIS) were recorded by an electrochemical workstation (CHI660E).

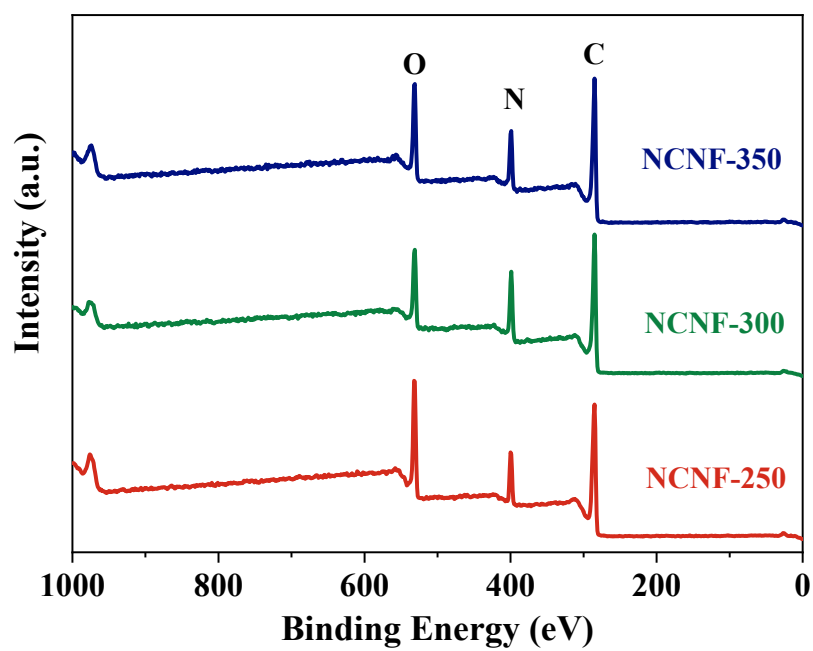

Figure S1. XPS full survey spectra of NCNF-250, NCNF-300, and NCNF-350

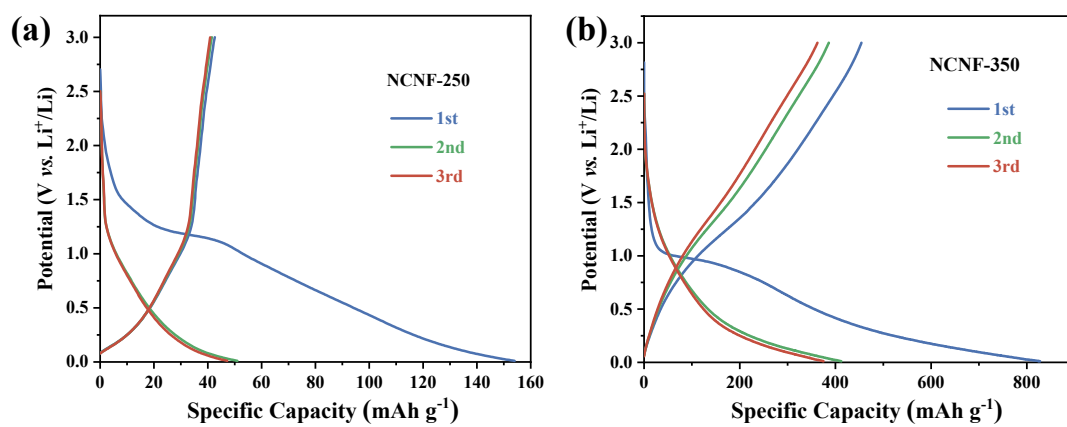

Figure S2. Galvanostatic charge/discharge profiles of NCNF-250 and NCNF-350 electrodes

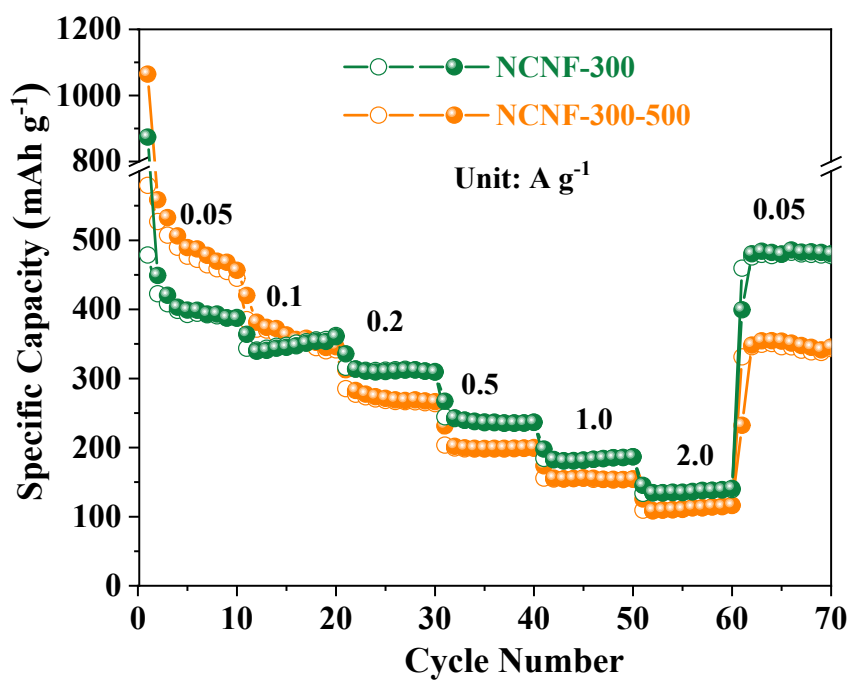

Figure S3. Rate performance comparison of NCNF-300 and NCNF-300-500 electrodes

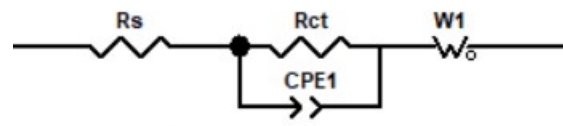

Figure S4. Fitted circuit of EIS analysis

Table S1. Porous structure parameters of NCNF-250, NCNF-300, and NCNF-350

| Sample   | BET surface area<br>( $\text{m}^2\cdot\text{g}^{-1}$ ) | Pore volume<br>( $\text{cm}^3\cdot\text{g}^{-1}$ ) | Average pore size<br>(nm) |
|----------|--------------------------------------------------------|----------------------------------------------------|---------------------------|
| NCNF-250 | 10.5                                                   | 0.013                                              | 7.1                       |
| NCNF-300 | 12.6                                                   | 0.021                                              | 10.1                      |
| NCNF-350 | 19.5                                                   | 0.027                                              | 6.0                       |
